## RESEARCH ARTICLE

# Advantages of statin usage in preventing fractures for men over 50 in the United States: National Health and Nutrition Examination Survey

Xiaona Sun<sup>1,2</sup>, Xiaoxiao Liu<sup>2,3</sup>, Chenyi Wang<sup>4</sup>, Yushuang Luo<sup>1,2</sup>, Xinyi Li<sup>1,2</sup>, Lijuan Yan<sup>4</sup>, Yaling Wang<sup>5\*</sup>, Kaifa Wang<sup>1\*</sup>, Qiang Li<sup>2\*</sup>

**1** School of Mathematics and Statistics, Southwest University, Chongqing, China, **2** Department of Hypertension and Endocrinology, Center for Hypertension and Metabolic Diseases, Chongqing Institute of Hypertension, Daping Hospital, Army Medical University, Chongqing, China, **3** Department of Nephrology, First Medical Center of Chinese PLA General Hospital, Nephrology Institute of the Chinese People's Liberation Army, National Key Laboratory of Kidney Diseases, National Clinical Research Center for Kidney Diseases, Beijing Key Laboratory of Kidney Disease Research, Beijing, China, **4** Department of Urology Surgery, Daping Hospital, Army Medical University, Chongqing, China, **5** Department of Nursing, Daping Hospital, Army Medical University, Chongqing, China

☞ These authors contributed equally to this work.

\* [liqianglife@126.com](mailto:liqianglife@126.com) (QL); [kfwang72@163.com](mailto:kfwang72@163.com) (KW); [930706229@qq.com](mailto:930706229@qq.com) (YW)

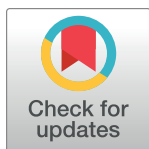

## OPEN ACCESS

**Citation:** Sun X, Liu X, Wang C, Luo Y, Li X, Yan L, et al. (2024) Advantages of statin usage in preventing fractures for men over 50 in the United States: National Health and Nutrition Examination Survey. PLoS ONE 19(11): e0313583. <https://doi.org/10.1371/journal.pone.0313583>

**Editor:** Hean Teik Ong, HT Ong Heart Clinic, MALAYSIA

**Received:** August 21, 2024

**Accepted:** October 25, 2024

**Published:** November 25, 2024

**Copyright:** © 2024 Sun et al. This is an open access article distributed under the terms of the [Creative Commons Attribution License](https://creativecommons.org/licenses/by/4.0/), which permits unrestricted use, distribution, and reproduction in any medium, provided the original author and source are credited.

**Data Availability Statement:** The datasets generated and/or analyzed during the current study are publicly available from the NHANES database (National Health and Nutrition Examination Survey) without restriction at <https://www.cdc.gov/nchs/nhanes>.

**Funding:** This work was supported by the National Natural Science Foundation of China (32171152 to QL, 12171396 to KFW). The funders had no role in study design, data collection and analysis, decision to publish, or preparation of the manuscript. There

## Abstract

### Objectives

The relationship between statin treatment and fracture risk is still controversial, especially in patients with cardiovascular diseases (CVDs). We aim to determine whether statin therapy affects the occurrence of fractures in the general US population and in patients with CVDs.

### Methods

Epidemiological data of this cross-sectional study were extracted from the National Health and Nutrition Examination Survey (NHANES, 2001–2020,  $n = 9,893$ ). Statins records and fracture information were obtained from the questionnaires. Weighted logistic regressions were performed to explore the associations between statin and the risk of fracture.

### Results

Statin use was found to be associated with reduced risk of fracture mainly in male individuals aged over 50 years old and taking medications for less than 3 years, after adjusted for confounders including supplements of calcium and vitamin D. The protective effects were only found in subjects taking atorvastatin and rosuvastatin. We found null mediation role of LDL-C and 25(OH)D in such effects. Statin was found to reduce fracture risk in patients with cardiovascular diseases (CVDs, OR: 0.4366, 95%CI: 0.2664 to 0.7154,  $P = 0.0014$ ), and in patients without diabetes (OR: 0.3632, 95%CI: 0.1712 to 0.7704,  $P = 0.0091$ ).

was no additional external funding received for this study.

**Competing interests:** The authors have declared that no competing interests exist.

## Conclusions

Statin showed advantages in reducing risk of fracture in male individuals aged over 50 years old and taking medications for less than 3 years. More research is needed to determine the impact of gender variations, medication duration, and diabetes.

## Introduction

The 3-hydroxy-3-methylglutaryl coenzyme A reductase (HMGCR) inhibitors (statins) are widely used for the primary prevention of cardiovascular diseases (CVDs) [1]. In addition to their well-known cholesterol-lowering properties, other advantageous pleiotropic effects of statins have been noticed, of particularly is their effect on bone metabolism. The earliest report had been demonstrated statins to promote bone growth associated with the upregulation of bone morphogenetic protein -2 (BMP-2) [2]. And thereafter statins were found to exhibit stimulation of osteoblast differentiation, suppression of osteoblast death, and inhibition of osteoclastogenesis [3]. Thus, statins are expected to have both cardioprotective and osteoprotective effects, and possibly used for prevention of osteoporosis [4].

However, observations from different studies remained inconclusive on the protective role of statins on osteoporosis and related fracture. Several observational studies have found the association of statins use with improved bone mineral density (BMD), as well as reduced risk of fractures [4–13]. However, some other observational studies and post hoc analysis of randomized clinical trials (RCTs) in patients with CVDs have not found consistent results, and in some cases, have even reported findings that contradict these results [14–23]. Furthermore, previous systemic reviews and meta-analyses also reported indefinite conclusions on the associations between statins usage and the risk of fracture, or with osteoporosis and BMD [12, 24–30]. Numerous factors were suggested contributing to the discrepancy among these studies, including study design, gender, ethnicity, statin dosage, length of treatment, and the specific statins used. However, the main comorbidities in the population using statins, such as coronary heart disease, hypertension, diabetes, and stroke, have not been analyzed as important influencing factors in previous studies. Current guidelines for the treatment of hypercholesterolemia in high-risk patients suffering from CVDs or diabetes strongly recommended cholesterol levels to be as low as possible. Thus, it is of great significance to elucidate the impact of long-term use of statins on the risk of fractures in patients with CVDs.

Due to the inconsistent findings of previous observational studies, we conducted a serial cross-sectional analysis of data from eight separate 2-year (2001–2010, 2013–2014, and 2017–2020) of the National Health and Nutrition Examination Surveys (NHANES) to determine the relationship between statins and risk of fracture in different CVDs. Mediation analysis was performed to figure out the mediating role of low-density lipoprotein cholesterol (LDL-C) and 25-hydroxyvitamin D (25(OH)D).

## Materials and methods

### Study participants

The data for this study comes from the NHANES (National Health and Nutrition Examination Survey) database, which is collected on a two-year cycle, and participants are required to provide informed consent. This study utilized NHANES data from various time periods: 2001–2010, 2013–2014, and 2017–2020. The years 2011–2012 and 2015–2016 were excluded from

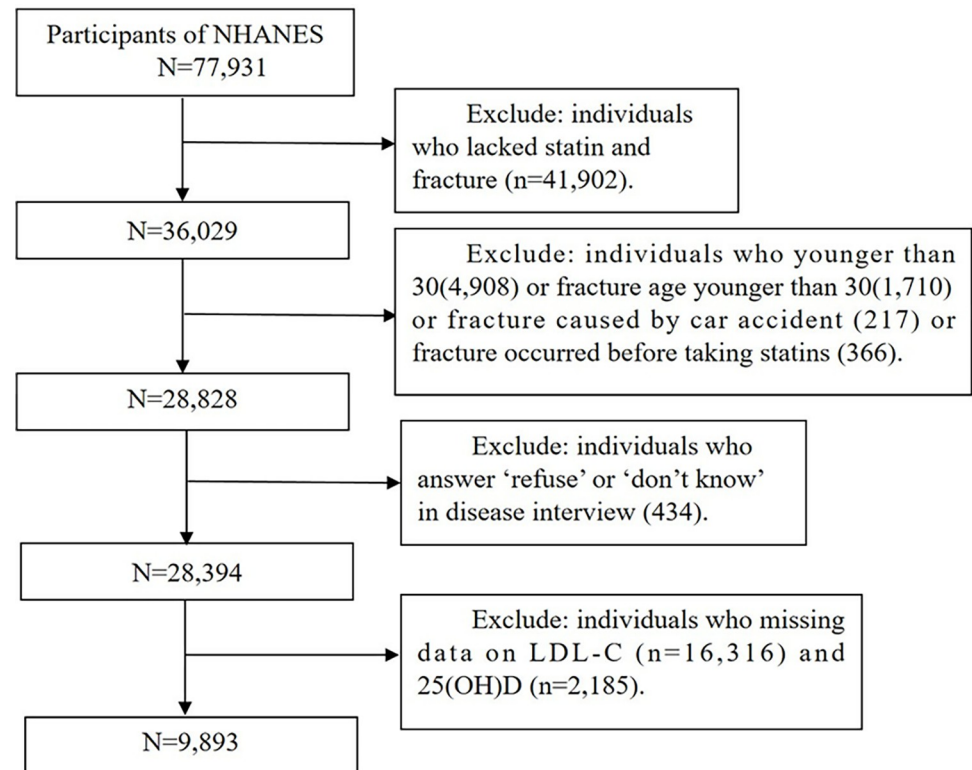

**Fig 1. Flow chart of the screening process for the selection of eligible participants.** LDL-C, low density lipoprotein cholesterol; 25(OH)D, 25-hydroxyvitamin D.

<https://doi.org/10.1371/journal.pone.0313583.g001>

the analysis as they did not contain fracture records. In total, there were 77,931 records available for analysis. To ensure the accuracy of the study, firstly, any missing data related to fractures and statin use were eliminated, resulting in 36,029 participants. Secondly, in order to ensure as reliable as possible the effect of statins on fractures, excluding data from interviews with individuals under 30 years old ( $n = 4,908$ ), those are younger than 30 years of age at the time of fracture ( $n = 1,710$ ), those with fractures caused by car accidents ( $n = 217$ ), and those with fractures occurring before statin medication ( $n = 366$ ). Additionally, excluding participants who answered 'refuse' or 'don't know' in disease interviews ( $n = 434$ ). Last, individuals lacking data on LDL-C ( $n = 16,316$ ) and 25(OH)D ( $n = 2,185$ ) were also eliminated. And ultimately, a total of 9893 participants were included in the study (Fig 1). All methods are conducted in accordance with relevant guidelines and regulations. Ethics approval was obtained by the National Center for Health Statistics and informed consent was obtained for all participants. Ethical review and approval were waived for this study due to the use of publicly available data.

## Statins and bone fracture

Prescription statins records were obtained from the questionnaire data, which were administered by trained interviewers. The interviews took place in participants' homes and used a computer-assisted personal interview (CAPI) system. During the household interviews, participants were asked whether they had taken any prescription medication within the past 30 days. Specifically, they were queried about seven statin drugs: Atorvastatin, Rosuvastatin, Simvastatin, Fluvastatin, Lovastatin, Pitavastatin and Pravastatin. Participants who responded "yes"

were asked to present their medication containers of all products they had used to the interviewer. The interviewer recorded the full name of each reported drug into the computer. If no container was available, participants were asked to verbally report the name of the medications. Additionally, participants reported the duration of time they had been taking the prescribed medication, which was recorded in days, weeks, months, or years. For analysis purposes, all responses were converted to days using conversion factors of 7 days per week, 30.4 days per month, and 365 days per year. Information on self-reported hip fracture, wrist fracture, or spine fracture were obtained from the osteoporosis section of the questionnaire. The occurrence of a hip, wrist, or spine fracture was defined as having experienced a fracture.

### Clinical examination

Laboratory data was used to obtain measurements of serum 25(OH)D. For NHANES 2001–2006, a regression method was applied to convert the data to equivalent 25(OH)D measurements obtained from a standardized liquid chromatography-tandem mass spectrometry (LC-MS/MS) method. The standardized LC-MS/MS method was used in the year 2007–2010. In 2013–2014 and 2017–2018, the ultra-high performance liquid chromatography-tandem mass spectrometry (UHPLC-MS/MS) method and high-performance liquid chromatography-tandem mass spectrometry (HPLC-MS/MS) method were used, respectively. These methods were utilized to quantitatively determine the level of 25(OH)D<sub>3</sub>, epi-25(OH)D<sub>3</sub>, and 25(OH)D<sub>2</sub>. The sum of 25(OH)D<sub>2</sub> and 25(OH)D<sub>3</sub> represents the total 25(OH)D concentration. The measurements of BMD in the femur and spine were recorded for the years 2005–2020 using dual-energy X-ray absorptiometry (DXA) at the NHANES Mobile Examination Center.

### Covariates

The NHANES investigators collected demographic information from participants residing in the sampled area. In order to control the effects of confounding factors, the following covariates were identified: age (actual value), gender (male or female), race (Mexican American, Other Hispanic, Non-Hispanic White, Non-Hispanic Black, Other Race), education level (Less than 9th grade, 9th–11th grade, High school graduate/GED or equivalent, Some college or AA degree, College graduate or above), Ratio of family income to poverty (PIR), body mass index (BMI), high-density lipoprotein cholesterol (HDL-C), LDL-C, Total Cholesterol (TC), Triglyceride (TG), Aspartate Aminotransferase (AST), Alanine Aminotransferase (ALT), Serum Creatinine (SCR), Blood Urea Nitrogen (BUN), 25(OH)D, Glycohemoglobin (HbA1c), Smoking (not at all; some day; every day), Alcohol consumption (never: never, lightly: less than 2 drinks per day on average in the past year; moderately: less than or equal to 3 drinks per day on average in the past year; Severely: greater than 3 drinks per day on average in the past year), supplements of calcium and vitamin D. The PIR is calculated by dividing the household or individual income by the Department of Health and Human Services (DHHS) poverty guidelines for the year of the survey. Additionally, information on certain diseases was collected, including hypertension (yes: self-reported physician diagnosis or systolic blood pressure (SBP)  $\geq$  130 or diastolic blood pressure (DBP)  $\geq$  80; or no), diabetes (yes: self-reported physician diagnosis or HbA1c  $\geq$  6.5% or fasting blood glucose (FBG)  $\geq$  7.0 mmol/L or oral glucose tolerance test 2-hour blood glucose  $\geq$  11.1 mmol/L; or no), arthritis, congestive heart failure, coronary heart disease, angina, heart attack, stroke, thyroid problem and liver problem.

### Statistical analysis

For the epidemiological observational studies, numerical results are presented as mean  $\pm$  SD, median with interquartile range, or n (%). Due to the large sample size and

overly sensitive nature of the normality test, we employed graphical method in conjunction with skewness and kurtosis to determine whether the data conformed to a normal distribution. Sample data with an absolute value of kurtosis less than 10 and an absolute value of skewness less than 3 were considered to approximately normally distribute [31]. Continuous variables that followed normal distribution were described using weighted means and weighted standard deviations, and that did not follow normal distribution were described using weighted medians and weighted interquartile ranges. Categorical variables were described using frequencies and weighted percentages. Differences among normal continuous variables between two groups were analyzed using independent samples T-tests, differences among non-normal continuous variables between two groups were analyzed using Kruskal-Wallis tests, and differences among categorical variables were analyzed using Pearson's chi-square tests.

The statistical analysis of this study was conducted in three steps. Firstly, we constructed four weighted logistic regression models with progressively increasing control variable to analyze the relationship between statins and fracture as well as the impact of gender disparities on the association between statins and fracture. Furthermore, we performed subgroup analyses for different age groups and examined the impact of statin use on fractures using weighted logistic regression models after controlled for all covariates. Secondly, the association between types or the cumulative number of days of statins medication and fractures was analyzed by weighted logistic regression modeling. Thirdly, mediation effect modeling [32] was used to explore whether LDL-C and 25(OH)D can mediate the association between statins and BMD or fractures. In this study, LDL-C or 25(OH)D was considered as the mediator variable, statins as the independent variable, and bone mineral density or fracture as the dependent variable. After constructing the mediator model, we tested the mediating effect using either the distribution of the product or the Bootstrap method [33, 34].

The study was statistically analyzed using R, version 4.3.2 (R Foundation for Statistical Computing) software, and a two-sided  $P < 0.05$  was considered statistically significant. Considering the complex sampling design of the NHANES database, all analyses were adjusted for the survey design and weighting variables, which were created following the NHANES analysis guidelines. Due to the analysis data ending at record number 83,723, which belongs to the 2013–2014 cycle, only data from 6 cycles were involved. A new weight variable was created, that is the fasting subsample weight divided by the number of cycles (6). The sample data was weighted using the survey package in R, and all analyses were adjusted based on the survey design and weighted variables.

## Results

### General characteristics of participants

In total of 9,893 participants were included in this study (Table 1). Approximately 19% of the participants had been taking statin medications. Aside from the liver problems, these participants were more likely to be older, have a higher BMI, lower HDL-C, LDL-C and TC levels but higher TG levels, higher glycohemoglobin levels, and a higher chance of having conditions such as arthritis, diabetes, hypertension, heart diseases and stroke. A noteworthy discovery was that despite higher levels of 25(OH)D in the statin group compared to non-statin group, these participants exhibited lower femoral BMD. We observed that the fracture group had an older age and a higher likelihood of fractures in females compared to males. Participants in fracture group exhibited lower femoral and spinal BMD as expected. However, none of differences in 25(OH)D were observed in patients with and without fractures.

Table 1. Baseline characteristics of participants.

| Characteristics                     | Statin use        |                   | P Value | Fracture          |                  | P Value |
|-------------------------------------|-------------------|-------------------|---------|-------------------|------------------|---------|
|                                     | Non (7985)        | Yes (1908)        |         | Non (9412)        | Yes (481)        |         |
| Age, mean (SD)                      | 50.32(13.63)      | 63.00(11.58)      | <0.001  | 52.22(14.04)      | 59.53(14.41)     | <0.001  |
| Gender                              |                   |                   |         |                   |                  |         |
| Male                                | 3671(44.5)        | 995(51.5)         | <0.001  | 4468 (46.0)       | 198(40.7)        | 0.074   |
| Female                              | 4314(55.5)        | 913(48.5)         |         | 4944 (54.0)       | 283(59.3)        |         |
| Race/Ethnicity                      |                   |                   |         |                   |                  |         |
| Mexican American                    | 1544(7.9)         | 214(3.5)          | <0.001  | 1681(7.2)         | 77(5.2)          | 0.016   |
| Other Hispanic                      | 604(4.5)          | 113(2.3)          |         | 694(4.2)          | 23(3.0)          |         |
| Non-Hispanic White                  | 3835(70.2)        | 1117(78.9)        |         | 4649(71.4)        | 303(79.4)        |         |
| Non-Hispanic Black                  | 1560(11.7)        | 346(9.2)          |         | 1848(11.5)        | 58 (6.7)         |         |
| Other Race                          | 442(5.6)          | 118(6.2)          |         | 540(5.7)          | 20(5.8)          |         |
| Education level                     |                   |                   |         |                   |                  |         |
| Less than 9th grade                 | 1170(7.2)         | 256(7.1)          | 0.089   | 1347(7.1)         | 79(8.9)          | 0.024   |
| 9–11th grade                        | 1175(11.5)        | 299(11.3)         |         | 1397(11.4)        | 77(12.0)         |         |
| High school graduate/GED            | 1760(23.2)        | 474(27.2)         |         | 2112(23.7)        | 122(28.2)        |         |
| Some college or AA degree           | 2115(29.3)        | 466(26.7)         |         | 2455(28.7)        | 126(30.3)        |         |
| College graduate or above           | 1765(28.9)        | 413(27.8)         |         | 2101(29.1)        | 77(20.7)         |         |
| PIR                                 |                   |                   |         |                   |                  |         |
| <130%                               | 2054(17.7)        | 444(16.1)         | 0.413   | 2345(17.1)        | 153(24.0)        | 0.001   |
| 130%–349%                           | 2846(35.9)        | 711(36.9)         |         | 3385(36.0)        | 172(38.7)        |         |
| ≥350%                               | 2505(46.4)        | 625(47.0)         |         | 3017(46.9)        | 113(37.3)        |         |
| BMI (kg/m <sup>2</sup> ), mean (SD) | 28.61(6.60)       | 30.01(6.62)       | <0.001  | 28.91(6.65)       | 27.95(6.04)      | 0.013   |
| HDL-c (mg/dL), mean (SD)            | 55.37 (16.72)     | 52.75 (14.33)     | <0.001  | 54.89 (16.33)     | 55.11 (16.87)    | 0.852   |
| LDL-c (mg/dL), mean (SD)            | 123.56(34.60)     | 98.97(32.16)      | <0.001  | 119.04(35.43)     | 122.30(35.70)    | 0.140   |
| TC (mg/dL), mean (SD)               | 204.06(39.02)     | 180.00(38.26)     | <0.001  | 199.57(39.86)     | 204.22(41.63)    | 0.077   |
| TG (mg/dL), median (IQR)            | 108.0[77.0,156.0] | 124.0[89.0,179.0] | <0.001  | 111.0[78.0,161.0] | 114.0[82.0,72.0] | 0.201   |
| ALT (U/L), median (IQR)             | 21.0[16.0,28.0]   | 22.0[18.0,28.0]   | 0.019   | 21.0[17.0,28.0]   | 20.0[17.0,28.0]  | 0.39    |
| AST (U/L), median (IQR)             | 22.0[19.0,27.0]   | 24.0[20.0,28.0]   | <0.001  | 23.0[19.0,27.0]   | 23.0[20.0,28.0]  | 0.069   |
| BUN (mg/dL), median (IQR)           | 12.0[10.0,15.0]   | 15.0[12.0,18.9]   | <0.001  | 13.0[10.0,16.0]   | 13.0[11.0,16.0]  | 0.105   |
| SCR (mg/dL), median (IQR)           | 0.84[0.7,1.0]     | 0.9[0.8,1.1]      | <0.001  | 0.87[0.7,1.0]     | 0.82[0.8,1.0]    | 0.744   |
| 25(OH)D (nmol/L), mean (SD)         | 64.99(24.98)      | 69.67(26.31)      | <0.001  | 65.71(25.30)      | 68.09(24.88)     | 0.065   |
| HbA1c (%), median [IQR]             | 5.4[5.2,5.7]      | 5.7 [5.5,6.3]     | <0.001  | 5.4[5.2,5.7]      | 5.5[5.2,5.8]     | 0.174   |
| FemurBMD(gm/cm2),mean(SD)           | 0.82(0.14)        | 0.78(0.15)        | <0.001  | 0.81(0.14)        | 0.74(0.15)       | <0.001  |
| SpineBMD(gm/cm2),mean (SD)          | 1.03(0.15)        | 1.03(0.16)        | 0.773   | 1.03(0.15)        | 0.97(0.15)       | <0.001  |
| Alcoholic use                       |                   |                   |         |                   |                  |         |
| Never                               | 2259(29.4)        | 597(34.2)         | <0.001  | 2691(29.8)        | 165(39.5)        | 0.012   |
| Lightly                             | 1465(25.2)        | 412(30.2)         |         | 1795(26.1)        | 82(24.1)         |         |
| Moderately                          | 1843(34.1)        | 357(29.9)         |         | 2125(33.7)        | 75(26.3)         |         |
| Severely                            | 718(11.3)         | 79(5.7)           |         | 763(10.3)         | 34(10.1)         |         |
| Smoking                             |                   |                   |         |                   |                  |         |
| Not at all                          | 6342(78.8)        | 1638(85.9)        | <0.001  | 7617(80.4)        | 363(72.1)        | 0.001   |
| Some day                            | 241(2.7)          | 44(1.9)           |         | 275(2.6)          | 10(2.0)          |         |
| Every day                           | 1397(18.5)        | 226(12.3)         |         | 1515(17.0)        | 108(25.9)        |         |
| Arthritis                           |                   |                   |         |                   |                  |         |
| Yes                                 | 2266(26.8)        | 940(46.5)         | <0.001  | 2942(29.2)        | 264(51.7)        | <0.001  |
| No                                  | 5719(73.2)        | 968(53.5)         |         | 6470(70.8)        | 217(48.3)        |         |
| Diabetes                            |                   |                   |         |                   |                  |         |

(Continued)



Table 1. (Continued)

| Characteristics              | Statin use |            | P Value | Fracture   |           | P Value |
|------------------------------|------------|------------|---------|------------|-----------|---------|
|                              | Non (7985) | Yes (1908) |         | Non (9412) | Yes (481) |         |
| Yes                          | 1745(6.1)  | 924(26.9)  | <0.001  | 2554(9.7)  | 115(10.2) | 0.905   |
| No                           | 4805(93.9) | 755(73.1)  |         | 5279(90.3) | 281(89.8) |         |
| Hypertension                 |            |            |         |            |           |         |
| Yes                          | 4364(29.8) | 1543(66.0) | <0.001  | 5572(35.8) | 335(45.3) | 0.001   |
| No                           | 3620(70.2) | 365(34.0)  |         | 3839(64.2) | 146(54.7) |         |
| Congestive heart failure (%) |            |            |         |            |           |         |
| Yes                          | 188(1.8)   | 172(7.0)   | <0.001  | 334(2.6)   | 26(5.0)   | 0.006   |
| No                           | 7797(98.2) | 1736(93.0) |         | 9078(97.4) | 455(95.0) |         |
| Coronary Heart Disease (%)   |            |            |         |            |           |         |
| Yes                          | 163(1.5)   | 320(16.1)  | <0.001  | 454(4.0)   | 29(4.7)   | 0.432   |
| No                           | 7822(98.5) | 1588(83.9) |         | 8958(96.0) | 452(95.3) |         |
| Angina (%)                   |            |            |         |            |           |         |
| Yes                          | 144(1.2)   | 182(9.4)   | <0.001  | 299(2.6)   | 27(3.5)   | 0.155   |
| No                           | 7841(98.8) | 1726(90.6) |         | 9113(97.4) | 454(96.5) |         |
| Heart attack (%)             |            |            |         |            |           |         |
| Yes                          | 225(2.1)   | 280(13.4)  | <0.001  | 475(4.0)   | 30(5.3)   | 0.23    |
| No                           | 7760(97.9) | 1628(86.6) |         | 8937(96.0) | 451(94.7) |         |
| Stroke (%)                   |            |            |         |            |           |         |
| Yes                          | 243(2.3)   | 195(8.4)   | <0.001  | 405(3.3)   | 33(5.5)   | 0.024   |
| No                           | 7742(97.7) | 1713(91.6) |         | 9007(96.7) | 448(94.5) |         |
| Thyroid problem (%)          |            |            |         |            |           |         |
| Yes                          | 546(7.3)   | 260(14.6)  | <0.001  | 755(8.4)   | 51(11.1)  | 0.091   |
| No                           | 7388(92.7) | 1640(85.4) |         | 8603(91.6) | 425(88.9) |         |
| Liver problem (%)            |            |            |         |            |           |         |
| Yes                          | 147(1.8)   | 30(1.5)    | 0.478   | 162(1.6)   | 15(4.0)   | 0.010   |
| No                           | 7783(98.2) | 1868(98.5) |         | 9187(98.4) | 464(96.0) |         |

SI conversion factors: To convert cholesterol to mmol/L, multiply values by 0.0259. PIR, ratio of family income to poverty; BMI, Body mass index; HDL-c, high-density lipoprotein cholesterol; LDL-c, low-density lipoprotein cholesterol; TC, total cholesterol; TG, triglycerides; ALT, alanine transaminase; AST, aspartate transaminase; BUN, blood urea nitrogen; SCR, serum creatinine; 25(OH)D, 25-hydroxyvitamin D; HbA1c, glycated hemoglobin; BMD, bone mineral density.

<https://doi.org/10.1371/journal.pone.0313583.t001>

## Comparison of the risk of bone fracture between patients with and without statin treatment

We developed several weighted multifactorial logistic regression models to explore the effect of statins treatment on fracture risk by continuously adding control variables. In present analysis, bone fracture was uncommon in patients treated with statin compared to non-statin group (OR: 0.4538, 95% CI: 0.2705 to 0.7612,  $P = 0.0034$ ), after adjusted for all baseline influencing factors (Table 2). In a sex-specific analysis, the protective effect of statin was overrepresented in male (OR: 0.2448, 95% CI: 0.0955 to 0.6272,  $P = 0.0040$ ) and marginal significantly in female participants (OR: 0.5536, 95% CI: 0.3120 to 0.9823,  $P = 0.0435$ ) (Table 2). In the age-stratified population analysis, after categorizing the participants into two age groups- 30–50 years, and greater than 50 years, the association between statin treatment and a decreased likelihood of fracture risk was only observed in participants aged over 50 years old (OR<sub>>50</sub>: 0.4755, 95% CI: 0.2894 to 0.7812,  $P = 0.0040$ , S1 Table). Similarly, we only found the protective effect of statin usage on fracture risk in male participants over the age of 50 (OR<sub>>50</sub>: 0.2061, 95% CI: 0.0786 to

**Table 2. Association between fracture risk and statin treatment.**

| Model                         | Statin use |         |                        |         |
|-------------------------------|------------|---------|------------------------|---------|
|                               | Ref        | Beta    | OR (95%CI)             | P Value |
| Participants = Overall (7134) |            |         |                        |         |
| Crude                         | 1          | -0.3933 | 0.6748(0.4240, 1.0742) | 0.0963  |
| Model1                        | 1          | -0.8155 | 0.4424(0.2649, 0.7388) | 0.0022  |
| Model2                        | 1          | -0.7937 | 0.4521(0.2695, 0.7587) | 0.0032  |
| Model3                        | 1          | -0.7901 | 0.4538(0.2705, 0.7612) | 0.0034  |
| Participants = male (3211)    |            |         |                        |         |
| Crude                         | 1          | -1.2238 | 0.2941(0.1273, 0.6797) | 0.0047  |
| Model1                        | 1          | -1.5258 | 0.2174(0.0881, 0.5366) | 0.0012  |
| Model2                        | 1          | -1.4072 | 0.2448(0.0935, 0.6410) | 0.0048  |
| Model3                        | 1          | -1.4075 | 0.2448(0.0955, 0.6272) | 0.0040  |
| Participants = female (3923)  |            |         |                        |         |
| Crude                         | 1          | 0.0346  | 1.0352(0.6234, 1.7191) | 0.8925  |
| Model1                        | 1          | -0.5370 | 0.5845(0.3293, 1.0376) | 0.0663  |
| Model2                        | 1          | -0.5843 | 0.5575(0.3151, 0.9865) | 0.0449  |
| Model3                        | 1          | -0.5913 | 0.5536(0.3120, 0.9823) | 0.0435  |

No statins were taken as the baseline group. The analysis was conducted using a weighted logistic regression model. The crude model did not adjust for any covariates. Model 1 was adjusted for age, gender, race, education, PIR, and BMI. Model 2 was adjusted for all the factors in Model 1, as well as LDL-Cholesterol (1-SD), HDL-Cholesterol (1-SD), Total Cholesterol (1-SD), Triglyceride (1-SD), Aspartate Aminotransferase (AST) (1-SD), Alanine Aminotransferase (ALT) (1-SD), Serum Creatinine (1-SD), Blood Urea Nitrogen (1-SD), 25-hydroxyvitamin D (1-SD), and HbA1c (1-SD). Model 3 was adjusted for all the factors in model2 plus Alcoholic use, smoking status and supplements of calcium and vitamin D.

<https://doi.org/10.1371/journal.pone.0313583.t002>

0.5402,  $P = 0.0017$ , [S1 Table](#)), while totally none protective role in female participants ([S1 Table](#)).

We further developed a mediation model to explore the relationship between statin usage and risk of fracture, with LDL-C and 25(OH)D as mediating variables. Unfortunately, we did not find a mediating effect ([S2 Table](#) and [S1 Fig](#)).

## Comparison of the different types, and treatment time of statins with the risk of fracture

Through the use of weighted multivariate logistic regression with no statins as the reference group, we discovered that patients who took atorvastatin (OR<sub>atorvastatin</sub>: 0.4619, 95% CI: 0.2376 to 0.8980,  $P < 0.05$ ) and rosuvastatin (OR<sub>rosuvastatin</sub>: 0.1054, 95% CI: 0.0199 to 0.5586,  $P < 0.05$ ) were at a lower risk of suffering from fractures ([S3 Table](#)). Participants were then grouped into three categories based on their duration of statin usage: 0–30.4, 30.4–1095, and >1095 days. After adjusting for confounding factors and using the 0–30.4 days group as reference, statin was identified as a statistically significant protective factor for fracture in patients who took statin treatment for less than 1095 days (OR<sub>30.4–1095</sub>: 0.3119, 95% CI: 0.1487 to 0.6540,  $P = 0.0026$ ). However, this protection disappears when taking statins exceeding 1095 days (OR<sub>>1095</sub>: 0.6353, 95% CI: 0.3278 to 1.2314,  $P = 0.1752$ , [Table 3](#)). Furthermore, sex-specific analysis also found similar results (OR<sub>male:30.4–1095</sub>: 0.1229, 95% CI: 0.0372 to 0.4067,  $P = 0.0009$ ; OR<sub>female:30.4–1095</sub>: 0.3987, 95% CI: 0.1782 to 0.8922,  $P = 0.0261$ , [Table 3](#)).



Table 3. Relationship between the number of days of statins and fracture.

| Fracture               | participants = overall (6672) |         | participants = male (3030) |         | participants = female (3642) |         |
|------------------------|-------------------------------|---------|----------------------------|---------|------------------------------|---------|
|                        | OR (95%CI)                    | P Value | OR (95%CI)                 | P Value | OR (95%CI)                   | P Value |
| Medication days        |                               |         |                            |         |                              |         |
| 0–30.4(5398/2388/3027) | 1                             |         | 1                          |         | 1                            |         |
| 30.4–1095(633/305/328) | 0.3119(0.1487, 0.6540)        | 0.0026  | 0.1229(0.0372, 0.4067)     | 0.0009  | 0.3987(0.1782, 0.8922)       | 0.0261  |
| >1095(641/337/287)     | 0.6353(0.3278, 1.2314)        | 0.1752  | 0.4311(0.1317, 1.4106)     | 0.1607  | 0.7413(0.3452, 1.5919)       | 0.4363  |

The analysis was conducted using a weighted logistic regression model and adjusted age, gender, race, education, PIR, BMI, LDL-Cholesterol (1-SD), Total Cholesterol (1-SD), HDL-Cholesterol (1-SD), Triglyceride (1-SD), Aspartate Aminotransferase (AST) (1-SD), Alanine Aminotransferase (ALT) (1-SD), Serum Creatinine (1-SD), Blood Urea Nitrogen (1-SD), 25-hydroxyvitamin D (1-SD), and HbA1c (1-SD), Alcoholic use, smoking status, supplements of calcium and vitamin D.

<https://doi.org/10.1371/journal.pone.0313583.t003>

## Association of statin use and fracture risk in patients with CVDs

Hypertension, arthritis, and diabetes are the three most common comorbidities in the database. We then investigated how statin therapy affected fracture risk across a range of comorbidities (Table 4). Statin was found to play a protective role against fracture risk in patients with arthritis (OR: 0.4910, 95%CI: 0.2606 to 0.9251,  $P = 0.0284$ ), hypertension (OR: 0.3960, 95%CI: 0.2369 to 0.6619,  $P = 0.0006$ ), and in patients without diabetes (OR: 0.3632, 95%CI: 0.1712 to 0.7704,  $P = 0.0091$ ) or arthritis (OR: 0.4034, 95%CI: 0.1816 to 0.8963,  $P = 0.0265$ ). Only marginal significance was observed in patients with diabetes ( $P = 0.0435$ ), and the benefits of statins in lowering fracture risk were vanished in hypertensive patients with diabetes ( $P = 0.1341$ ). Moreover, individuals with conventional CV illnesses, such as hypertension, stroke, and congestive heart failure, also showed similar protective effects (OR: 0.4366, 95%CI: 0.2664 to 0.7154,  $P = 0.0014$ ). By using multiple confounder adjustment in linear regression analysis, we discovered that an increase in spine BMD was associated with decrease in LDL in

Table 4. Relationship between statin and fracture in different disease populations.

| Diseases                                            | Beta    | OR (95%CI)             | P Value |
|-----------------------------------------------------|---------|------------------------|---------|
| Diabetes (5938)                                     |         |                        |         |
| Yes (1829)                                          | -0.8041 | 0.4475(0.2052, 0.9761) | 0.0435  |
| No (4109)                                           | -0.1013 | 0.3632(0.1712, 0.7704) | 0.0091  |
| Hypertension (7134)                                 |         |                        |         |
| Yes (4225)                                          | -0.9264 | 0.3960(0.2369, 0.6619) | 0.0006  |
| No (2909)                                           | -0.3309 | 0.7183(0.2581, 1.9991) | 0.5201  |
| Arthritis (7134)                                    |         |                        |         |
| Yes (2255)                                          | -0.7112 | 0.4910(0.2606, 0.9251) | 0.0284  |
| No (4879)                                           | -0.9077 | 0.4034(0.1816, 0.8963) | 0.0265  |
| Hypertension/Stroke/Congestive Heart Failure (7134) |         |                        |         |
| Yes (4294)                                          | -0.8288 | 0.4366(0.2664, 0.7154) | 0.0014  |
| No (2840)                                           | -0.4016 | 0.6692(0.2038, 2.1977) | 0.5017  |
| Hypertension & Diabetes (5938)                      |         |                        |         |
| Yes (1349)                                          | -0.6174 | 0.5393(0.2391, 1.2165) | 0.1341  |
| No (1849)                                           | -0.0977 | 0.9069(0.2860, 2.8759) | 0.8661  |

The analysis was conducted using a weighted logistic regression model and adjusted age, gender, race, education, PIR, BMI, LDL-Cholesterol (1-SD), Total Cholesterol (1-SD), HDL-Cholesterol(1-SD), Triglyceride (1-SD), Aspartate Aminotransferase (AST) (1-SD), Alanine Aminotransferase (ALT) (1-SD), Serum Creatinine (1-SD), Blood Urea Nitrogen (1-SD), 25-hydroxyvitamin D (1-SD), and HbA1c (1-SD), Alcoholic use, smoking status, supplements of calcium and vitamin D.

<https://doi.org/10.1371/journal.pone.0313583.t004>

patients with diabetes ( $\beta$ : -10.9319, 95%CI: -19.0744 to -2.7893,  $P = 0.0101$ ) and without hypertension ( $\beta$ : -7.9945, 95%CI: -13.2323 to -2.7568,  $P = 0.0039$ ), and this correlation persisted with femoral BMD in patients without hypertension (S4 Table).

## Discussion

The current study examined the association between the use of statins and the risk of fractures by epidemiological data from the NHANSE. We found that statin could reduce risk of fracture mainly in male individuals aged over 50 years old and taking medications for less than 3 years, and such protective effects were only found in atorvastatin and rosuvastatin. Statin was found to reduce fracture risk in patients with CVD, including hypertension, stroke, and congestive heart failure, and in patients without diabetes.

## Potential mechanism

Cholesterol homeostasis is important in regulating the proliferation and stimulation of osteoblasts and osteoclasts, as well as bone metabolism. Golgi-resident site-1 protease (S1P), LXR ( $\alpha$ ,  $\beta$ ), LDL receptor (LDLR), ATP-binding cassette transporter A1 (ABCA1), and lysosomal acid lipase (LAL) have been suggested involving in the relationship between cholesterol metabolism and osteoporosis [3, 35]. Oxidized LDL (oxLDL), which is critical in the initiation and progression of atherosclerosis, had also been reported to be linked to osteoclastogenesis, bone resorption, and osteoblast demineralization through elevating levels of the receptor activator of NF-kappaB ligand (RANKL), or inhibiting phosphate signaling and phosphate-induced mineralization [36, 37]. Furthermore, recent study found that osteoblast demineralization could be induced by oxidized HDL via the inflammatory pathway [38].

Numerous mechanisms had been proposed potential beneficial effects of statins on bone metabolism. Statins were suggested to be contributed to the bone formation through multiple ways, including enhanced BMP-2 expression [2], inhibited osteoclast activity through reducing the synthesis of FPP and GGPP, blocking the Ras/ERK pathway, and activating p38MAPK [39, 40], inhibited osteoblastic apoptosis through the TGF $\beta$ /Smad3 signaling pathway [41, 42], decreased osteoclastogenesis by regulating the estrogen receptor or osteoprotegerin/RANKL/RANK pathway [43–45], increased 25-hydroxy-vitamin D concentrations [46], and fostered osteoblast activity [47, 48].

In contrary, there is also concern on the potential deleterious consequences of statins impacts on sex hormone levels such as testosterone or estrogen [49]. since the endogenous synthesis of cholesterol was the main substrate for the synthesis of sex hormones. Particularly, in the postmenopausal state, oestrogen is crucial for the maintenance of BMD [50]. Both in mice models and cell lines studies have found that statins could reduce plasma levels of testosterone, oestradiol and progesterone [51, 52]. Furthermore, decreased BMD by various statins were also discovered in rodents' study [53].

## Comparison with other studies

Osteoporosis was more common in postmenopausal women, and in men aged 50 years or older [54, 55]. In the young, fractures occur more frequently in males, whereas from the age of 50 years onwards, fractures in females predominate, and the rates become approximately twice those in men [56, 57]. Several population-based cohort studies in Asia with subjects aged over 50 years, found that statin use was associated with a decreased risk of new-onset osteoporosis or fracture in both genders [48, 58, 59]. This is supported by earlier researches on populations in Europe, America, and even elderly patients [6–8], and also in postmenopausal women [5, 9]. Our study's general population analysis was consisted with earlier researches showing the beneficial effects of statin

medication on lowering the risk of fracture. On the other hand, a number of randomized clinical trials, such as the JUPITER, Scandinavian Simvastatin Survival Study (4S), Long Term Intervention with Pravastatin in Ischemic Disease (LIPID), and Heart Protection Study (HPS) studies, discovered that statins for CVDs did not reduce the risk of fracture in individuals of a comparable age [21, 22, 60, 61]. Contradictory result was observed in our study. We also found decreased risk of fracture in patients with hypertension, stroke, and congestive heart failure who used statins. However, such benefits were not found in patients with diabetes, but in patients without diabetes. Results from the Women's Health Initiative Observational Study also found none beneficial effects of statins on improving fracture risk [15]. A retrospective examination of Austrian population revealed that statin use was linked to an overrepresentation of osteoporosis diagnoses in both sexes, particularly in the age-class of 40–50 years [17]. Furthermore, another case-control study found that statin use was related to an increased rate of osteoporosis in the  $\geq 60$ -year-old female group [62]. In contrast, we found decreased fracture risk in male participants aged over 50 years old, while none role of statin uses on risk of fracture in female subjects. Likewise, statins did not lower the incidence of fracture in the research for the treatment of osteoporosis that involved mostly female participants [63]. Noteworthy, we also found that statin was associated with reduced fracture risk in patients with CVDs. However, we did not discover any such preventive benefits of statins on the risk of fractures in patients with diabetes. Given the increased risk of fractures and lipid abnormalities associated with diabetes, this finding may help to explain why the fracture-protective benefit of statins was not seen in earlier subgroup analyses in RCT studies. This impact may be related to the high blood sugar levels observed in these patients.

Additionally, there were debatable topics regarding the possible impacts on bone metabolism of various statin kinds, dosages, and durations. Longer statin duration, higher cumulative dose, or higher statin intensity may be linked to a lower risk of significant osteoporotic fracture, according to certain observational studies [48, 58, 59]. In contrast, research by *Leutner M* and colleagues demonstrated that osteoporosis diagnosis in statin-treated patients was dose-dependent, with a higher incidence of osteoporosis in those on high-dose statin therapy [17]. And they also showed that the dosage-dependent relationship between statin use and osteoporosis risk would not be confounded by comorbidities such as CVDs, overweight and obesity, stroke, diabetes, *etc.* Two additional studies found no associations between the duration of statin use and the risk of osteoporosis or fracture [15, 62]. Similarly, we discovered that statin therapy was linked to a lower incidence of fracture, but only in those who had treatment for fewer than three years, after which the beneficial benefits vanished. Statins are categorized as lipophilic (atorvastatin, simvastatin, pitavastatin, and lovastatin) and relatively hydrophilic (fluvastatin, pravastatin and rosuvastatin) based on their intrinsic polar properties. In our study, atorvastatin and rosuvastatin were found to be related with lower risk of suffering from fractures and rosuvastatin reduces more risk of fractures. This difference in efficacy could potentially be attributed to variances in their polarity and bone bioavailability. Studies have shown that lipophilic statins, but not hydrophilic statins, were associated with an increased rate of osteoporosis in the women aged over 60 years [62]. The high absorption rate of lipophilic statins could heighten the impact of estrogen deprivation in elderly women [62]. While hydrophilic statins have been reported to exhibit a decreased absorption rate and dependency on the cytochrome P450 enzyme, resulting in fewer adverse effects than lipophilic statins [64]. Furthermore, it was recently reported that patients on lipophilic statins had statistically lower BMD than females on hydrophilic statins, and the BMD decreased in a dose-dependent of statin [65]. However, it has also been found that lipophilic statins, instead of hydrophilic statins, have demonstrated superior outcomes in terms of osteoporotic fractures [25, 66], lipophilic statins have been found to enhance BMP-2 expression, which further promotes osteoblast differentiation.

Inconsistent outcomes regarding the impact of statins on fracture were also observed across different fracture sites. Traditionally, long bone fractures are the most common type of fracture seen in the young (as a result of substantial trauma), while the forearm, hip and vertebrae are the sites most susceptible to fracture in older individuals [55, 57, 67]. Several studies demonstrated protective role of statins on reducing hip and vertebral fractures compared to non-statin users [48, 59]. Nevertheless, meta-analysis of RCTs or observational studies found no association between statin use and fracture reduction, or only in hip fractures [27, 28]. Recent meta-analysis examined the effects of statin therapy in the elderly and discovered that the only fractures linked to statin use were those of the hip and lower extremities [26]. Notably, only less than one year duration of atorvastatin use was associated with a reduction in fracture risk [26]. The majority of vertebral fractures do not currently come to medical attention and thus remain undiagnosed [68]. However, vertebral fractures are strong risk factors for subsequent fracture at the spine and other skeletal sites [55].

Whether statins exert their effects on bone metabolism through regulating dyslipidemia is still controversial. Observational studies evaluating the association between lipids and BMD are inconsistent, with some studies showing no association, while others have reported either a negative or a positive effect [69]. Meta-analyses also did not overcome these discrepancies. Chen YY *et al.* compared the lipid profile in postmenopausal women found that HDL-C and TC concentrations were higher in the osteoporosis compared with the normal BMD group [70]. While another meta-analysis performed in patients with osteopenia or osteoporosis, only found HDL-C was elevated in patients with osteoporosis [71]. Besides, there was one newly cohort study suggested that higher levels of HDL-C are associated with an increased fracture risk in healthy older adults [72]. In our study, we did not find significant differences in lipid profiles between individuals with and without fracture at baseline. Furthermore, none mediating effects of either LDL and 25(OH)D were found between statins usage and fracture risk in mediation model analysis. Noteworthy, individuals with fracture had lower femur and spine BMD as expected, while decreased femur BMD was also found in subjects taking statins.

### Strengths and limitations of this study

This study has several important strengths. First, our study data was extracted from NHANES 2001–2020, which is a timely and of high-quality national population-based survey with large sample size. Second, we have effectively corrected the impact of trauma, medications (calcium and vitamin D supplements), and other confounding factors on the occurrence of fractures, thus further enhancing the reliability of the results. Third, we further explored the impact of statin use on the occurrence of fractures in patients with risk of cardiovascular events such as hypertension and diabetes. Thus, it has certain clinical guidance value in the use of statins in patients with comorbidities.

The current study has some shortcomings that need to be addressed. (1) NHANES was still cross-sectional design, which failed to provide longitudinal follow-up data and unable to establish causal relationships. A prospective study on the effect of statin use on osteoporosis is warranted. (2) NHANES is a nationwide survey, but its results mainly reflect the health status of the American population, so the universality of the research results for other countries or regions is still uncertain. (3) self-reported comorbidities were present, and 18,935 people were omitted due to incomplete data on any of the primary variables, potentially influencing the outcomes. (4) Although we have adjusted for majority of confounding factors in the model, there are still confounding factors that cannot be ruled out due to data limitations, such as physical activity, dietary factors, muscle loss, statin dosage and intensity.

## Conclusions

In summary, current study provided evidence that statin use was associated with reduced risk of fracture in patients with CVDs, mainly in male individuals and within a certain period of treatment. Patients undergoing long-term lipid-lowering therapy, especially female patients or patients with diabetes, require further clinical observation to determine the protective effects.

## Supporting information

**S1 Table. Age-specific analysis of association between fracture risk and statin treatment.**  
(DOCX)

**S2 Table. The mediating effect of LDL-C on the association between statin and femoral or spine BMD.**  
(DOCX)

**S3 Table. Effect of different statin types on fractures.**  
(DOCX)

**S4 Table. Association between LDL-C and BMD in different disease populations.**  
(DOCX)

**S1 Fig. Mediation effect to LDL-C(A) or 25(OH)D(B) on the relationship between statin and fracture.** Adjusted for age, gender, race, education, PIR, BMI, Total Cholesterol (1-SD), HDL- Cholesterol (1-SD), Triglyceride (1-SD), Aspartate Aminotransferase (AST), Alanine Aminotransferase (ALT) (1-SD), Serum Creatinine (1-SD), Blood Urea Nitrogen (1-SD), and HbA1c (1-SD), smoking and drinking status, supplements of calcium and vitamin D; CI, confidence interval.  
(TIF)

## Acknowledgments

We thank all the participants and technical supporters involved in this study.

## Author Contributions

**Conceptualization:** Xiaona Sun, Xiaoxiao Liu, Chenyi Wang, Yaling Wang, Kaifa Wang, Qiang Li.

**Data curation:** Xiaona Sun, Xiaoxiao Liu, Chenyi Wang, Yushuang Luo, Xinyi Li, Lijuan Yan, Qiang Li.

**Formal analysis:** Xiaona Sun, Xiaoxiao Liu, Yushuang Luo, Xinyi Li.

**Funding acquisition:** Kaifa Wang, Qiang Li.

**Methodology:** Xiaona Sun.

**Resources:** Qiang Li.

**Supervision:** Xiaona Sun, Kaifa Wang.

**Writing – original draft:** Xiaona Sun, Xiaoxiao Liu, Chenyi Wang, Kaifa Wang, Qiang Li.

**Writing – review & editing:** Xiaona Sun, Xiaoxiao Liu, Chenyi Wang, Yaling Wang, Kaifa Wang, Qiang Li.

## References

1. Baigent C, Keech A, Kearney PM, Blackwell L, Buck G, Pollicino C, et al. Efficacy and safety of cholesterol-lowering treatment: prospective meta-analysis of data from 90,056 participants in 14 randomised trials of statins. *Lancet*. 2005; 366 (9493):1267–1278. [https://doi.org/10.1016/S0140-6736\(05\)67394-1](https://doi.org/10.1016/S0140-6736(05)67394-1) PMID: 16214597
2. Mundy G, Garrett R, Harris S, Chan J, Chen D, Rossini G, et al. Stimulation of bone formation in vitro and in rodents by statins. *Science*. 1999; 286(5446):1946–1949. <https://doi.org/10.1126/science.286.5446.1946> PMID: 10583956
3. Akhmetshina A, Kratky D, Rendina-Ruedy E. Influence of Cholesterol on the Regulation of Osteoblast Function. *Metabolites*. 2023; 13(4):578. <https://doi.org/10.3390/metabo13040578> PMID: 37110236
4. Deligiorgi MV, Panayiotidis MI, Siasos G, Trafalis DT. Osteoporosis Entwined with Cardiovascular Disease: The Implication of Osteoprotegerin and the Example of Statins. *Curr Med Chem*. 2021; 28 (7):1443–1467. <https://doi.org/10.2174/0929867327666200123151132> PMID: 31971101
5. Chan KA, Andrade SE, Boles M, Buist DS, Chase GA, Donahue JG, et al. Inhibitors of hydroxymethylglutaryl-coenzyme A reductase and risk of fracture among older women. *Lancet*. 2000; 355 (9222):2185–2188. [https://doi.org/10.1016/S0140-6736\(00\)02400-4](https://doi.org/10.1016/S0140-6736(00)02400-4) PMID: 10881890
6. Scranton RE, Young M, Lawler E, Solomon D, Gagnon D, Gaziano JM. Statin use and fracture risk: study of a US veterans population. *Arch Intern Med*. 2005; 165(17):2007–2012. <https://doi.org/10.1001/archinte.165.17.2007> PMID: 16186471
7. Wang PS, Solomon DH, Mogun H, Avorn J. HMG-CoA reductase inhibitors and the risk of hip fractures in elderly patients. *JAMA*. 2000; 283(24):3211–3216. <https://doi.org/10.1001/jama.283.24.3211> PMID: 10866868
8. Meier CR, Schlienger RG, Kraenzlin ME, Schlegel B, Jick H. HMG-CoA reductase inhibitors and the risk of fractures. *JAMA*. 2000; 283(24):3205–3210. <https://doi.org/10.1001/jama.283.24.3205> PMID: 10866867
9. Helin-Salmivaara A, Korhonen MJ, Lehenkari P, Junnila SY, Neuvonen PJ, Ruokoniemi P, et al. Statins and hip fracture prevention—a population based cohort study in women. *PLoS One*. 2012; 7(10): e48095. <https://doi.org/10.1371/journal.pone.0048095> PMID: 23144731
10. Lupattelli G, Scarponi AM, Vaudo G, Siepi D, Roscini AR, Gemelli F, et al. Simvastatin increases bone mineral density in hypercholesterolemic postmenopausal women. *Metabolism*. 2004; 53(6):744–748. <https://doi.org/10.1016/j.metabol.2004.01.010> PMID: 15164322
11. Edwards CJ, Hart DJ, Spector TD. Oral statins and increased bone-mineral density in postmenopausal women. *Lancet*. 2000; 355(9222):2218–2219. [https://doi.org/10.1016/s0140-6736\(00\)02408-9](https://doi.org/10.1016/s0140-6736(00)02408-9) PMID: 10881898
12. Liu J, Zhu LP, Yang XL, Huang HL, Ye DQ. HMG-CoA reductase inhibitors (statins) and bone mineral density: a meta-analysis. *Bone*. 2013; 54(1):151–156. <https://doi.org/10.1016/j.bone.2013.01.044> PMID: 23388418
13. Rejnmark L, Olsen ML, Johnsen SP, Vestergaard P, Sørensen HT, Mosekilde L. Hip fracture risk in statin users—a population-based Danish case-control study. *Osteoporos Int*. 2004; 15(6):452–458. <https://doi.org/10.1007/s00198-003-1568-z> PMID: 15205716
14. van Staa TP, Wegman S, de Vries F, Leufkens B, Cooper C. Use of statins and risk of fractures. *JAMA*. 2001; 285(14):1850–1855. <https://doi.org/10.1001/jama.285.14.1850> PMID: 11308398
15. LaCroix AZ, Cauley JA, Pettinger M, Hsia J, Bauer DC, McGowan J, et al. Statin use, clinical fracture, and bone density in postmenopausal women: results from the Women's Health Initiative Observational Study. *Ann Intern Med*. 2003; 139(2):97–104. <https://doi.org/10.7326/0003-4819-139-2-200307150-00009> PMID: 12859159
16. Wada Y, Nakamura Y, Koshiyama H. Lack of positive correlation between statin use and bone mineral density in Japanese subjects with type 2 diabetes. *Arch Intern Med*. 2000; 160(18):2865. <https://doi.org/10.1001/archinte.160.18.2865> PMID: 11025797
17. Leutner M, Matzhold C, Bellach L, Deischinger C, Harreiter J, Thurner S, et al. Diagnosis of osteoporosis in statin-treated patients is dose-dependent. *Ann Rheum Dis*. 2019; 78(12):1706–1711. <https://doi.org/10.1136/annrheumdis-2019-215714> PMID: 31558481
18. Majima T, Shimatsu A, Komatsu Y, Satoh N, Fukao A, Ninomiya K, et al. Short-term effects of pitavastatin on biochemical markers of bone turnover in patients with hypercholesterolemia. *Intern Med*. (Tokyo, Japan). 2007; 46(24):1967–1973. <https://doi.org/10.2169/internalmedicine.46.0419> PMID: 18084118
19. Bjarnason NH, Riis BJ, Christiansen C. The effect of fluvastatin on parameters of bone remodeling. *Osteoporos Int*. 2001; 12(5):380–384. <https://doi.org/10.1007/s001980170106> PMID: 11444086
20. El-Sohemy A. Statin drugs and the risk of fracture. *JAMA*. 2000; 284(15):1921–1922.



21. Reid IR, Hague W, Emberson J, Baker J, Tonkin A, Hunt D, et al. Effect of pravastatin on frequency of fracture in the LIPID study: secondary analysis of a randomized controlled trial. *Lancet*. 2001; 357(9255):509–512.
22. Peña JM, Asperg S, MacFadyen J, Glynn RJ, Solomon DH, Ridker PM. Statin therapy and risk of fracture results from the JUPITER randomized clinical trial. *JAMA Intern Med*. 2015; 175(2):171–177. <https://doi.org/10.1001/jamainternmed.2014.6388> PMID: 25437881
23. Pedersen TR, Wilhelmsen L, Faergeman O, Strandberg TE, Thorgeirsson G, Troedsson L, et al. Follow-up study of patients randomized in the Scandinavian simvastatin survival study (4S) of cholesterol lowering. *Am J Cardiol*. 2000; 86(3):257–262. [https://doi.org/10.1016/s0002-9149\(00\)00910-3](https://doi.org/10.1016/s0002-9149(00)00910-3) PMID: 10922429
24. Toh S, Hernández-Díaz S. Statins and fracture risk. A systematic review. *Pharmacoepidemiology and drug safety*. 2007; 16:627–640. <https://doi.org/10.1002/pds.1363> PMID: 17286319
25. Hatzigeorgiou C, Jackson JL. Hydroxymethylglutaryl-coenzyme A reductase inhibitors and osteoporosis: a meta-analysis. *Osteoporos Int*. 2005; 16(8):990–998. <https://doi.org/10.1007/s00198-004-1793-0> PMID: 15744453
26. Shi R, Mei Z, Zhang Z, Zhu Z. Effects of Statins on Relative Risk of Fractures for Older Adults: An Updated Systematic Review With Meta-Analysis. *JAMDA*. 2019; 20(12):1566–1578. <https://doi.org/10.1016/j.jamda.2019.06.027> PMID: 31395495
27. An T, Hao J, Sun S, Li R, Yang M, Cheng G, et al. Efficacy of statins for osteoporosis: a systematic review and meta-analysis. *Osteoporos Int*. 2017; 28(1):47–57. <https://doi.org/10.1007/s00198-016-3844-8> PMID: 27888285
28. Wang Z, Li Y, Zhou F, Piao Z, Hao J. Effects of Statins on Bone Mineral Density and Fracture Risk: A PRISMA-compliant Systematic Review and Meta-Analysis. *Medicine (Baltimore)*. 2016; 95(22):e3042. <https://doi.org/10.1097/MD.0000000000003042> PMID: 27258488
29. Jin S, Jiang J, Bai P, Zhang M, Tong X, Wang H, et al. Statin use and risk of fracture: a meta-analysis. *Int J Clin Exp Med*. 2015; 8(5):8269–8275. PMID: 26221409
30. Uzzan B, Cohen R, Nicolas P, Cucherat M, Perret GY. Effects of statins on bone mineral density: A meta-analysis of clinical studies. *Bone*. 2007; 40(6):1581–1587. <https://doi.org/10.1016/j.bone.2007.02.019> PMID: 17409043
31. Kline R, Kline R B, Kline R. Principles and Practice of Structural Equation Modelling. *Journal of the American Statistical Association*. 2011; 101(12).
32. Chen H, Shao Z, Gao Y, Yu X, Huang S, Zeng P. Are blood lipids risk factors for fracture? Integrative evidence from instrumental variable causal inference and mediation analysis using genetic data. *Bone*. 2020; 131:115–174. <https://doi.org/10.1016/j.bone.2019.115174> PMID: 31785374
33. Fang Jie, Wen Zhonglin, Zhang Minqiang. Mediating effect analysis of categorical variables. *Psychological Science*. 2017; 40(02):471–477.
34. Chen Rui, Zheng Yuhuang, Liu Wenjing. Mediation effect analysis: principle, procedure, Bootstrap method and its application. *Journal of Marketing Science*. 2013; 9(4):120–135.
35. Bao C, Wu T, Zhu S, Wang X, Zhang Y, Wang X, et al. Regulation of cholesterol homeostasis in osteoporosis mechanisms and therapeutics. *Clinical Science*. 2023; 137(15):1131–1143. <https://doi.org/10.1042/CS20220752> PMID: 37553962
36. Mazière C, Salle V, Gomila C, Mazière JC. Oxidized low density lipoprotein enhanced RANKL expression in human osteoblast-like cells. Involvement of ERK, NFκB and NFAT. *Biochim Biophys Acta*. 2013; 1832(10):1756–1764. <https://doi.org/10.1016/j.bbadis.2013.05.033> PMID: 23756197
37. Mazière C, Savitsky V, Galmiche A, Gomila C, Massy Z, Mazière JC. Oxidized low density lipoprotein inhibits phosphate signaling and phosphate-induced mineralization in osteoblasts. Involvement of oxidative stress. *Biochim Biophys Acta*. 2010; 1802(11):1013–1019. <https://doi.org/10.1016/j.bbadis.2010.07.010> PMID: 20667472
38. Harun NH, Froemming GRA, Mohd Ismail A, Nawawi H, Mokhtar SS, Abd Muid S. Osteoblast Demineralization Induced by Oxidized High-Density Lipoprotein via the Inflammatory Pathway Is Suppressed by Adiponectin. *Int J Mol Sci*. 2022; 23(23):14616. <https://doi.org/10.3390/jms232314616> PMID: 36498945
39. Weivoda MM, Hohl RJ. The effects of direct inhibition of geranylgeranyl pyrophosphate synthase on osteoblast differentiation. *J Cell Biochem*. 2011; 112(6):1506–1513. <https://doi.org/10.1002/jcb.23087> PMID: 21503955
40. Tsubaki M, Satou T, Itoh T, Imano M, Yanae M, Kato C, et al. Bisphosphonate- and statin-induced enhancement of OPG expression and inhibition of CD9, M-CSF, and RANKL expressions via inhibition of the Ras/MEK/ERK pathway and activation of p38MAPK in mouse bone marrow stromal cell line ST2.

*Mol Cell Endocrinol.* 2012; 361(1–2):219–231. <https://doi.org/10.1016/j.mce.2012.05.002> PMID: 22579611

41. Heldin CH, Miyazono K, ten Dijke P. TGF-beta signalling from cell membrane to nucleus through SMAD proteins. *Nature.* 1997; 390(6659):465–471. <https://doi.org/10.1038/37284> PMID: 9393997
42. Kaji H, Naito J, Inoue Y, Sowa H, Sugimoto T, Chihara K. Statin suppresses apoptosis in osteoblastic cells: role of transforming growth factor- $\beta$ -Smad3 pathway. *Horm Metab Res.* 2008; 40(11):746–751.
43. Wei W, Schwaid AG, Wang X, Wang X, Chen S, Chu Q, et al. Ligand Activation of ERR $\alpha$  by Cholesterol Mediates Statin and Bisphosphonate Effects. *Cell Metab.* 2016; 23(3):479–91.
44. Boyle WJ, Simonet WS, Lacey DL. Osteoclast differentiation and activation. *Nature.* 2003; 423(6937):337–342. <https://doi.org/10.1038/nature01658> PMID: 12748652
45. Kaji H, Kanatani M, Sugimoto T, Chihara K. Statins modulate the levels of osteoprotegerin/receptor activator of NF kappa B ligand mRNA in mouse bone-cell cultures. *Horm Metab Res.* 2005; 37(10):589–92. <https://doi.org/10.1055/s-2005-870538> PMID: 16278780
46. Yavuz B, Ertugrul DT, Cil H, Ata N, Akin KO, Yalcin AA, et al. Increased levels of 25 hydroxyvitamin D and 1,25-dihydroxyvitamin D after rosuvastatin treatment: a novel pleiotropic effect of statins? *Cardio-vasc Drugs Ther.* 2009; 23(4):295–299. <https://doi.org/10.1007/s10557-009-6181-8> PMID: 19543962
47. Qiao LJ, Kang KL, Heo JS. Simvastatin promotes osteogenic differentiation of mouse embryonic stem cells via canonical Wnt/beta-catenin signaling. *Mol. Cells.* 2011; 32(5):437–444.
48. Lin SM, Wang JH, Liang CC, Huang HK. Statin Use Is Associated With Decreased Osteoporosis and Fracture Risks in Stroke Patients. *J Clin Endocrinol Metab.* 2018; 103(9):3439–3448. <https://doi.org/10.1210/je.2018-00652> PMID: 29982482
49. Schooling CM, Au Yeung SL, Freeman G, Cowling BJ. The effect of statins on testosterone in men and women, a systematic review and meta-analysis of randomized controlled trials. *BMC Med.* 2013; 11:57. <https://doi.org/10.1186/1741-7015-11-57> PMID: 23448151
50. Bone HG, Greenspan SL, McKeever C, Bell N, Davidson M, Downs RW, et al. Alendronate and estrogen effects in postmenopausal women with low bone mineral density. Alendronate/Estrogen Study Group. *J Clin Endocrinol Metab.* 2000; 85(2):720–726. <https://doi.org/10.1210/jcem.85.2.6393> PMID: 10690882
51. Zhang X, Li J, Zhou X, Guan Q, Zhao J, Gao L, et al. Simvastatin decreases sex hormone levels in male rats. *Endocr Pract.* 2017; 23(2):175–181. <https://doi.org/10.4158/EP161274> OR PMID: 27849375
52. Guldvang A, Hansen CH, Weisser JJ, Halling-Sørensen B, Styrihave B. Simvastatin decreases steroid production in the H295R cell line and decreases steroids and FSH in female rats. *Reprod Toxicol.* 2015; 58:174–183. <https://doi.org/10.1016/j.reprotox.2015.10.005> PMID: 26476359
53. Maritz FJ, Conradie MM, Hulley PA, Gopal R, Hough S. Effect of Statins on Bone Mineral Density and Bone Histomorphometry in Rodents. *Arterioscler Thromb Vasc Biol.* 2001; 21(10):1636–1641. <https://doi.org/10.1161/hq1001.097781> PMID: 11597938
54. Qaseem A, Hicks LA, Etkeandia-Ikobaltzeta I, Shamlivan T, Cooney TG Clinical Guidelines Committee of the American College of Physicians, et al. Pharmacologic Treatment of Primary Osteoporosis or Low Bone Mass to Prevent Fractures in Adults: A Living Clinical Guideline From the American College of Physicians. *Ann Intern Med.* 2023; 176(2):224–238. <https://doi.org/10.7326/M22-1034> PMID: 36592456
55. Gregson CL, Armstrong DJ, Bowden J, Cooper C, Edwards J, Gittoes NJL, et al. UK clinical guideline for the prevention and treatment of osteoporosis. *Archives of Osteoporosis.* 2022; 17(1):58. <https://doi.org/10.1007/s11657-022-01061-5> PMID: 35378630
56. Curtis EM, van der Velde R, Moon RJ, van den Bergh JP, Geusens P, de Vries F, et al. Epidemiology of fractures in the United Kingdom 1988–2012: variation with age, sex, geography, ethnicity and socioeconomic status. *Bone.* 2016; 87:19–26. <https://doi.org/10.1016/j.bone.2016.03.006> PMID: 26968752
57. Clynes MA, Harvey NC, Curtis EM, Fuggle NR, Dennison EM, Cooper C. The epidemiology of osteoporosis. *British Medical Bulletin.* 2020; 133(1):105–117. <https://doi.org/10.1093/bmb/ldaa005> PMID: 32282039
58. Lin TK, Chou P, Lin CH, Hung YJ, Jong GP. Long-term effect of statins on the risk of new-onset osteoporosis: A nationwide population-based cohort study. *PLoS One.* 2018; 13(5): e0196713. <https://doi.org/10.1371/journal.pone.0196713> PMID: 29723231
59. Kim KJ, Choi J, Kim JY, Bae JH, Kim KJ, Kim HY, et al. Statin Therapy and the Risk of Osteoporotic Fractures in Patients with Metabolic Syndrome: a Nested Case-Control Study. *J Lipid Atheroscler.* 2021; 10(3):322–333. <https://doi.org/10.12997/jla.2021.10.3.322> PMID: 34621703
60. Gurm HS, Hoogwerf B. The Heart Protection Study: high-risk patients benefit from statins, regardless of LDL-C level. *Cleve Clin J Med.* 2003; 70(11):991–997. <https://doi.org/10.3949/ccjm.70.11.991> PMID: 14650474

61. Rizzo M, Rini GB. Statins, Fracture Risk, and Bone Remodeling: What Is True? *Am J Med Sci*. 2006; 332(2):55–60. <https://doi.org/10.1097/00000441-200608000-00001> PMID: 16909050
62. Kim SY, Yoo DM, Min C, Kim JH, Kwon MJ, Kim JH, et al. Association between Osteoporosis and Previous Statin Use: A Nested Case-Control Study. *Int J Environ Res Public Health*. 2021 Nov 12; 18(22):11902. <https://doi.org/10.3390/ijerph182211902> PMID: 34831656
63. Coco-Martín MB, Leal-Vega L, Blázquez-Cabrera JA, Navarro A, Moro MJ, Arranz-García F, et al. Influence of non-osteoporotic treatments in patients on active anti-osteoporotic therapy: evidence from the OSTEOMED registry. *Eur J Clin Pharmacol*. 2023; 79(10):1333–1339. <https://doi.org/10.1007/s00228-023-03544-x> PMID: 37515605
64. McKenney JM. Pharmacologic characteristics of statins. *Clin Cardiol*. 2003; 26 (Suppl. 3):32–38. <https://doi.org/10.1002/clc.4960261507> PMID: 12708637
65. Antonenko A, Leahy A, Babenko M, Lyons D. Low dose hydrophilic statins are the preferred agents for females at risk of osteoporosis. *Bone Reports*. 2021; 16:101–152 <https://doi.org/10.1016/j.bonr.2021.101152> PMID: 34934779
66. Jadhav SB, Narayana Murthy PS, Singh MM, Jain GK. Distribution of lovastatin to bone and its effect on bone turnover in rats. *J Pharm Pharmacol*. 2006; 58(11):1451–1458. <https://doi.org/10.1211/jpp.58.11.0005> PMID: 17132207
67. European Prospective Osteoporosis Study (EPOS) Group, Felsenberg D, Silman AJ, Lunt M, Armbricht G, Ismail AA, et al. Incidence of vertebral fracture in Europe: results from the European prospective osteoporosis study (EPOS). *J Bone Miner Res*. 2002; 17(4):716–724.
68. Fink HA, Milavetz DL, Palermo L, Nevitt MC, Cauley JA, Genant HK, et al. What proportion of incident radiographic vertebral deformities is clinically diagnosed and vice versa. *J Bone Miner Res*. 2005; 20(7):1216–1222. <https://doi.org/10.1359/JBMR.050314> PMID: 15940375
69. Anagnostis P, Florentin M, Livadas S, Lambrinoudaki I, Goulis DG. Bone Health in Patients with Dyslipidemias: An Underestimated Aspect. *Int J Mol Sci*. 2022; 23(3):1639.
70. Chen YY, Wang WW, Yang L, Chen WW, Zhang HX. Association between lipid profiles and osteoporosis in postmenopausal women: A meta-analysis. *Eur Rev Med Pharmacol Sci*. 2018; 22(1):1–9. [https://doi.org/10.26355/eurrev\\_201801\\_14093](https://doi.org/10.26355/eurrev_201801_14093) PMID: 29364465
71. Zhao H, Li Y, Zhang M, Qi L, Tang Y. Blood lipid levels in patients with osteopenia and osteoporosis: a systematic review and meta-analysis. *J. Bone Miner. Metab*. 2021; 39(3):510–520. <https://doi.org/10.1007/s00774-020-01189-9> PMID: 33415412
72. Hussain SM, Ebeling PR, Barker AL, Beilin LJ, Tonkin AM, McNeil JJ. Association of Plasma High-Density Lipoprotein Cholesterol Level With Risk of Fractures in Healthy Older Adults. *JAMA Cardiol*. 2023; 8(3):268–272. <https://doi.org/10.1001/jamacardio.2022.5124> PMID: 36652261
